# Supplementary material for: Nutritional regulation of glucose metabolism-related genes in the emerging teleost model Mexican tetra surface fish: a first exploration
Source: R Soc Open Sci. 2020 Feb 26;7(2):191853. doi: 10.1098/rsos.191853 (PMC7062055; doi:10.1098/rsos.191853)
Supplement: Supplementary Table 1 [file rsos191853supp1.xlsx]

## Sheet: Feuil1
	name	gene	Forward primer (5'-3')	Reverse primer (5'-3')	NCBI Accession number (or reference)
gluconeogenesis	glucose-6-phosphatase encoding gene	g6pca	TCTTCCCCATCTGGTTCCAC	AACTTGTCTGAGAGCTGGGG	XM_007233994
		g6pcb1	GTGTCTGTCCAGGGTCTTCA	CAGACTGGCCTGGTAGATCC	XM_022669349.1
		g6pcb2	TTGCTGCTCATTTCCCTCAC	CCAGAGCAAATGAGAGCAGG	XM_007236143
	fructose-1,6-bisphosphatase	fbp1a	GCTCACCACACTGCTGAATG	TGGTCCCCAGTCACATTTGT	XM_007257688.3
		fbp1b	ACACCTGTAGTACAACCTGC	GCTTCTTCACCTGGTCTCCT	XM_007258081.3
		fbp2	GAAAGCAGGACTCGCACAC	GGGGTGACAATGGCCTCTTT	XM_007257687.3
	phosphoenolpyruvate carboxykinase	pck1	CCAGAACCAGTCATGCCCC	TGCAACATCACGAGGGTCAG	XM_007244163.3
		pck2	CGAGTGATGGTGGGATCTGG	CCCTCTTCACTCTCCCACAG	XM_022666914.1
glycolysis	glucokinase	gck	GCGGAGAGTTGGAGGACTTC	CAATCTGGGAGACGAAGCGA	XM_007234214.3
	hexokinase 2	hk2	TGGAGGAGGGGATGAAGAGA	CCCTGCATGATGTCCTGAGA	XM_022664688.1
	phosphofructokinase liver specific	pfkla	CGAGACGAGATTCCCGGAAG	ATACCCATCCGAGTGACAGC	XM_007230429
		pfklb	AATCACTGACACCCTGGCTC	CCATCACCTCCAGCACAAAC	XM_007246113
	pyruvate kinase liver specific	pklr	CTAAAGGGCCAGAAATCCGC	GTTCACCCACCCTTCACCTA	XM_007256898
	phosphofructokinase muscle specific	pfkma	GGAAACAGAACGGGGAAAGTC	CCCTCACTGCAGCATTCATTC	XM_007246741.3
		pfkmb	ACCTCAAAAGCAACACAGACTTC	TCCTCTCTTCTTGATCACACTCT	XM_015607125.2
	pyruvate kinase muscle specific	pkma	TTTGGGCAGAGGATGTGGAC	AGGTCACAGGGAAGGGAAGA	XM_007239644.3
		pkmb	AGAAGGGCAAGGAGATCAGGG	CACACGTGATGGGTTTGCC	XM_007246603.3
glucose transporter		glut1a	TCCGACAGAAAGCATGTGACA	GAGCCCCACTGAGAAGGAAC	XM_007246305.3
		glut1b	AACTGTACACACGCCACGAT	AGTTCCTCCTTCCAAAGCGG	XP_007253420.1
		glut2	CCTAAGCATGTCGGCCATCT	AAGAGGAAGAGCAGCACCAC	XR_002649614.1
		glut4	TCAGCTAGGAGGAGAGAGGA	CCCCACAGAGAAGGAGGAGA	XM_007255725.3
		sglt1a	GACATGGCCGGCAACAAAAC	GCTACCGATGTTACTGGCGA	XM_007231981.2
		sglt1b	CGCTGCCAACACCACCAG	CAAACCATGTTCCTGCCAGC	XM_022681124.1
		glut3a	TGGGTTCGGCGTTATGGAAA	AGAGAGCCACCAATCACAGC	XM_007258225.3
		glut3b	TGGTCATCGGTCTGTTCTGC	GCCACAGATACTCAGAGCCC	XM_022673989.1
		glut5	GGTCAGCTGTCCGTTCTCAA	TCGTTCTCTTTCACCCCTGC	XM_007246291.2
		glut8	AGGAGCAGGGAGAAGAGGAG	CCACCAAGACCTGCTCCAAT	XM_015607041.2
lipids metabolism	glucose-6-phosphate deshydrogenase	g6pda	GATGGGAAGTGGAGCGAGTG	TTTTGCCAGATCTCCCGAGG	XM_007228963.3
		g6pdb	TGACTTCCCGCCGGTGAA	TTCTTCTTGGCAAGGTCCCC	XM_022677108.1
	fatty acids synthase	fasn	CACTGTGCGCATTCATCCAG	TATTGGTCCGCAGCCTTCAG	XM_022669052.1
Reference genes	elongation factor 1-alpha	ef1α	CCAAGGAAGTCAGCGCTTAC	CCGCTAGCATTACCCTCCTT	XM_007245711.3
	alpha-actin	α-actin	TTGTGCTATGTGGCTCTGGA	TGTGTTGGCATACAGGTCCT	XM_007260267.3
	ribosomal RNA 18S	18S	GAGTATGGTTGCAAAGCTGAAA	CCGGACATCTAAGGGCATCA	McGaugh at al., 2014, Nature Communication
